# Supplementary material for: Type I IFN Triggers RIG-I/TLR3/NLRP3-dependent Inflammasome Activation in Influenza A Virus Infected Cells
Source: PubMed Central journal article supplement (PMC3623797; doi:10.1371/journal.ppat.1003256), 2013-04-11

Fig. S4 Pothlichet et al.,

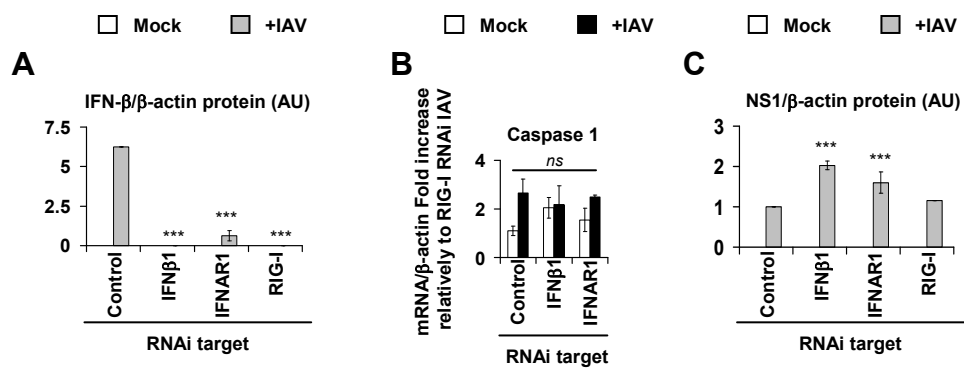

Supplement: ppat.1003256.s004.pdf [file ppat.1003256.s004.pdf]
